# Supplementary material for: A bifunctional [Ch][Triz] ionic liquid catalyst for CO2 transformation into quinazoline-2,4(1H,3H)-diones under mild conditions
Source: Royal Society of Chemistry journal article supplement (doi:10.1039/d4nj03975k), 2024-01-01
Supplement: d4nj03975k1.pdf [file d4nj03975k1.pdf]

## Supporting Information

# A bifunctional [Ch][Triz] ionic liquid catalyst for CO<sub>2</sub> transformation into quinazoline-2,4(1H,3H)-diones under mild conditions

Xiang Gao<sup>\*a</sup>, Jiajia Zhao<sup>a</sup>, Jiao Liu<sup>a</sup>, Yuehua Deng<sup>a</sup>, Ying Gao<sup>\*b</sup>, Fei Wang<sup>c</sup> and Yanrui Li<sup>d</sup>

<sup>a</sup> College of Geology and Environment, Xi'an University of Science and Technology, Xi'an 710054, China.

<sup>b</sup> Department of Teaching Quality Evaluation, Yan'an University, Yan'an 716000, China.

<sup>c</sup> College of Geology Engineering and Geomatics, Chang'an University, Xi'an 710054, China.

<sup>d</sup> College of Materials Science and Engineering, Xi'an University of Science and Technology, Xi'an 710054, China.

\*Correspondence: gaoxiang@iccas.ac.cn (X. G.); gaoying200777@126.com (Y. G.).

### This file includes:

- 1 □ <sup>13</sup>C NMR spectra of [Ch][Triz], and the intermediate of [Ch][Triz] exposed to CO<sub>2</sub>, Figure S1.
- 2 □ <sup>1</sup>H NMR spectra of the as-synthesized ILs, Figure S2-S6.
- 3 □ <sup>1</sup>H NMR spectra of the products, Figure S7-S11.

1.  $^{13}\text{C}$  NMR spectra of  $[\text{Ch}][\text{Triz}]$ , and the intermediate of  $[\text{Ch}][\text{Triz}]$  exposed to  $\text{CO}_2$ , Figure S1

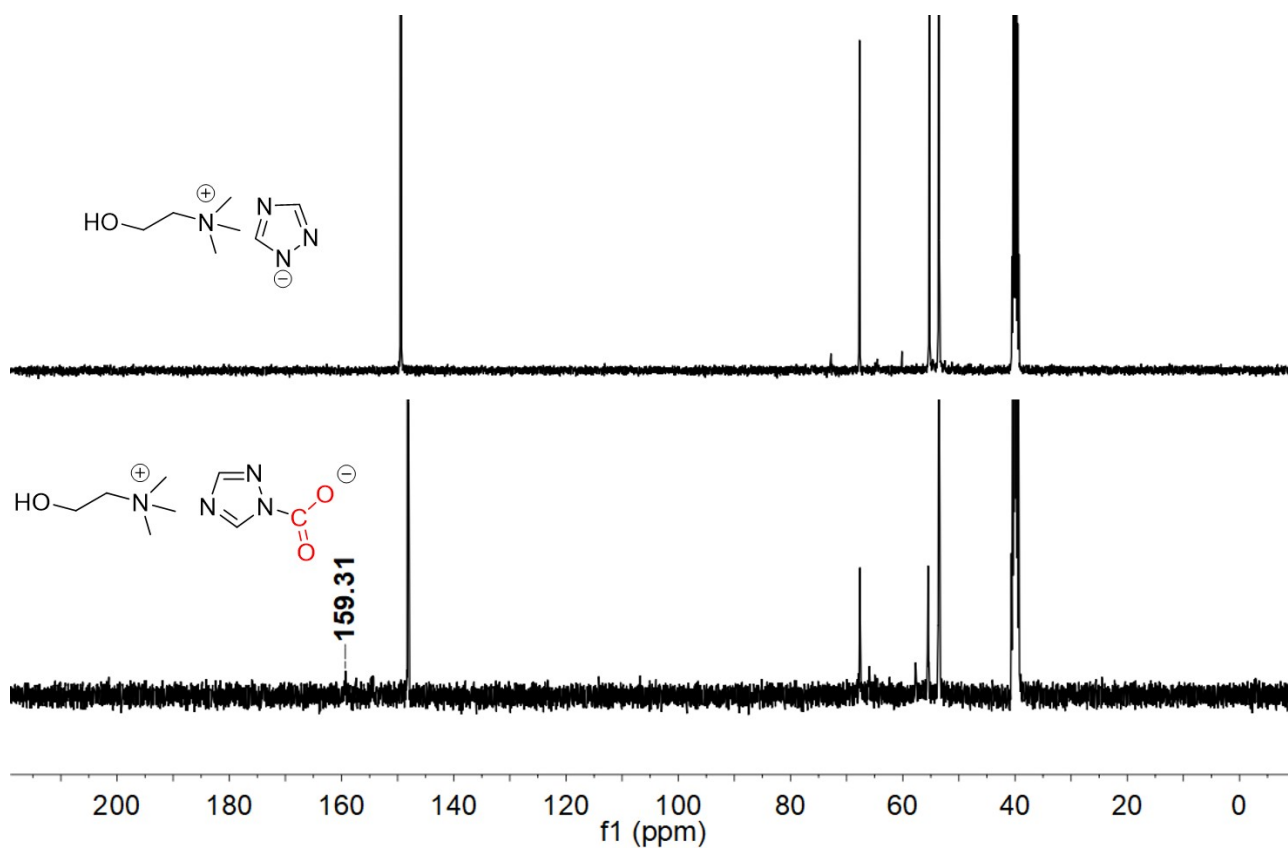

**Figure S1.** The  $^{13}\text{C}$  NMR spectra of  $[\text{Ch}][\text{Triz}]$ , and the intermediate of  $[\text{Ch}][\text{Triz}]$  exposed to atmospheric pressure  $\text{CO}_2$  at  $50\text{ }^\circ\text{C}$  for 24 h, (DMSO- $\text{d}_6$ , 298 K).

## 2. $^1\text{H}$ NMR spectra of as-synthesized ILs, Figure S2-S6

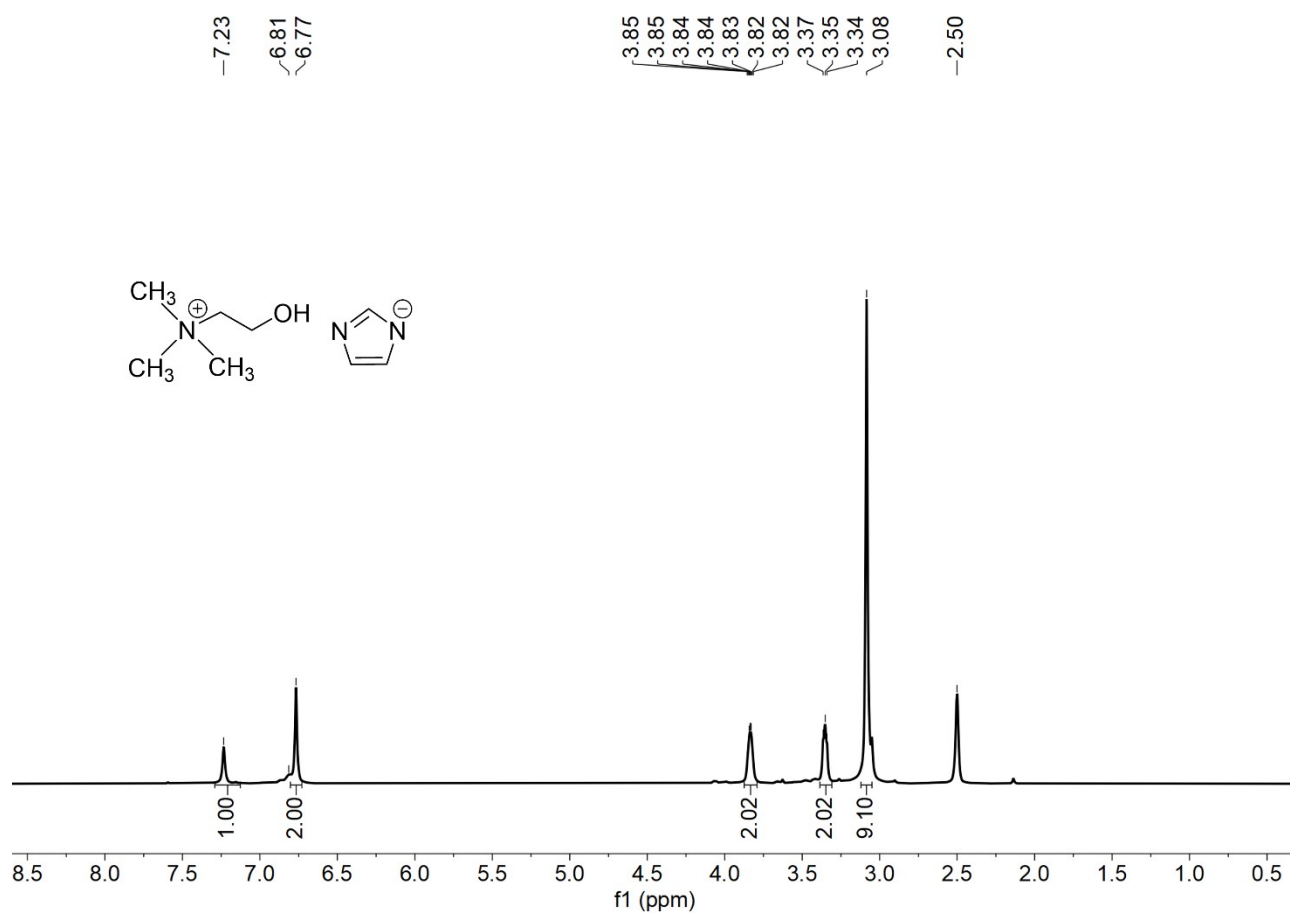

**Figure S2.**  $^1\text{H}$  NMR spectra of [Ch][Im]

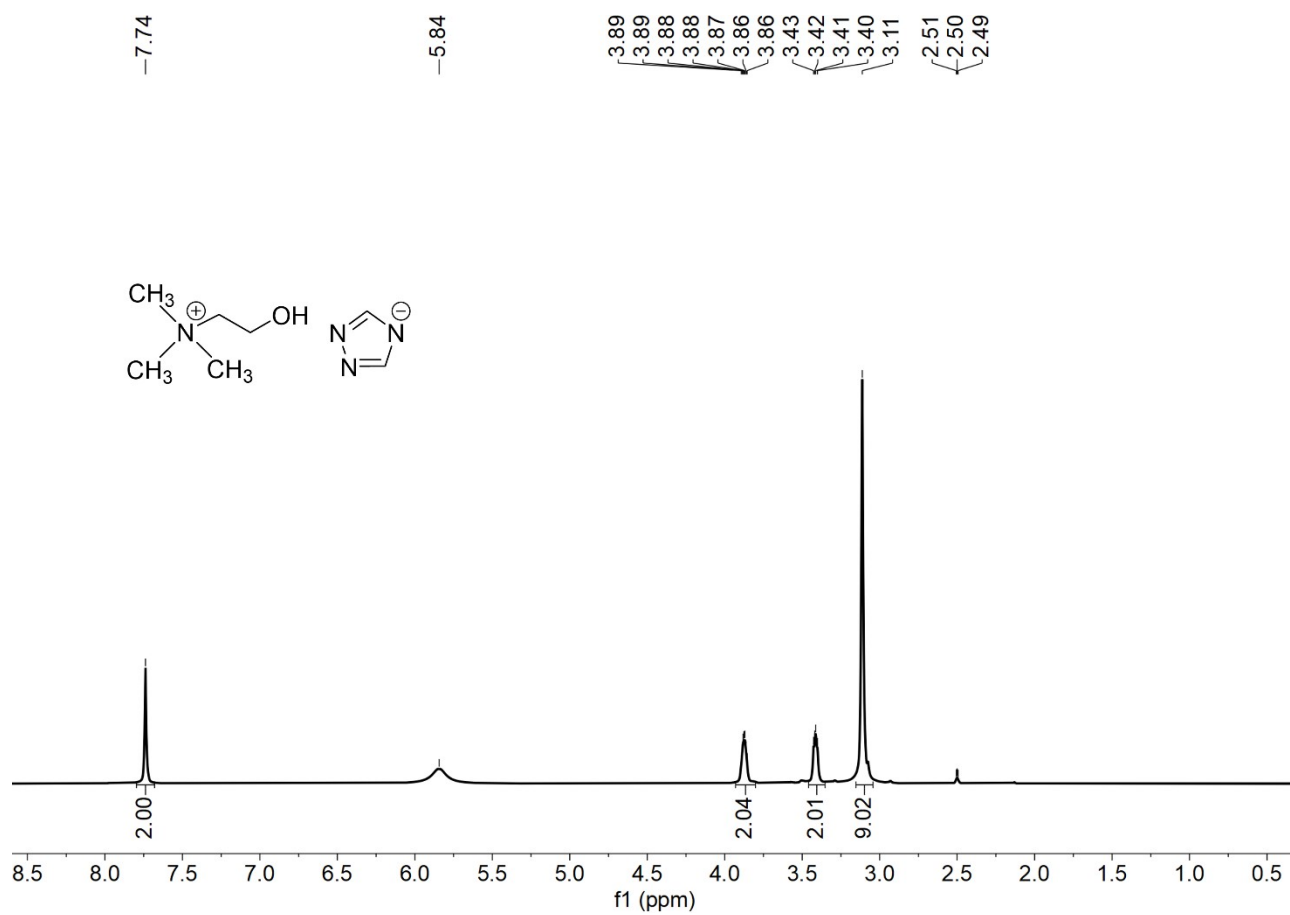

**Figure S3.** <sup>1</sup>H NMR spectra of [Ch][Triz]

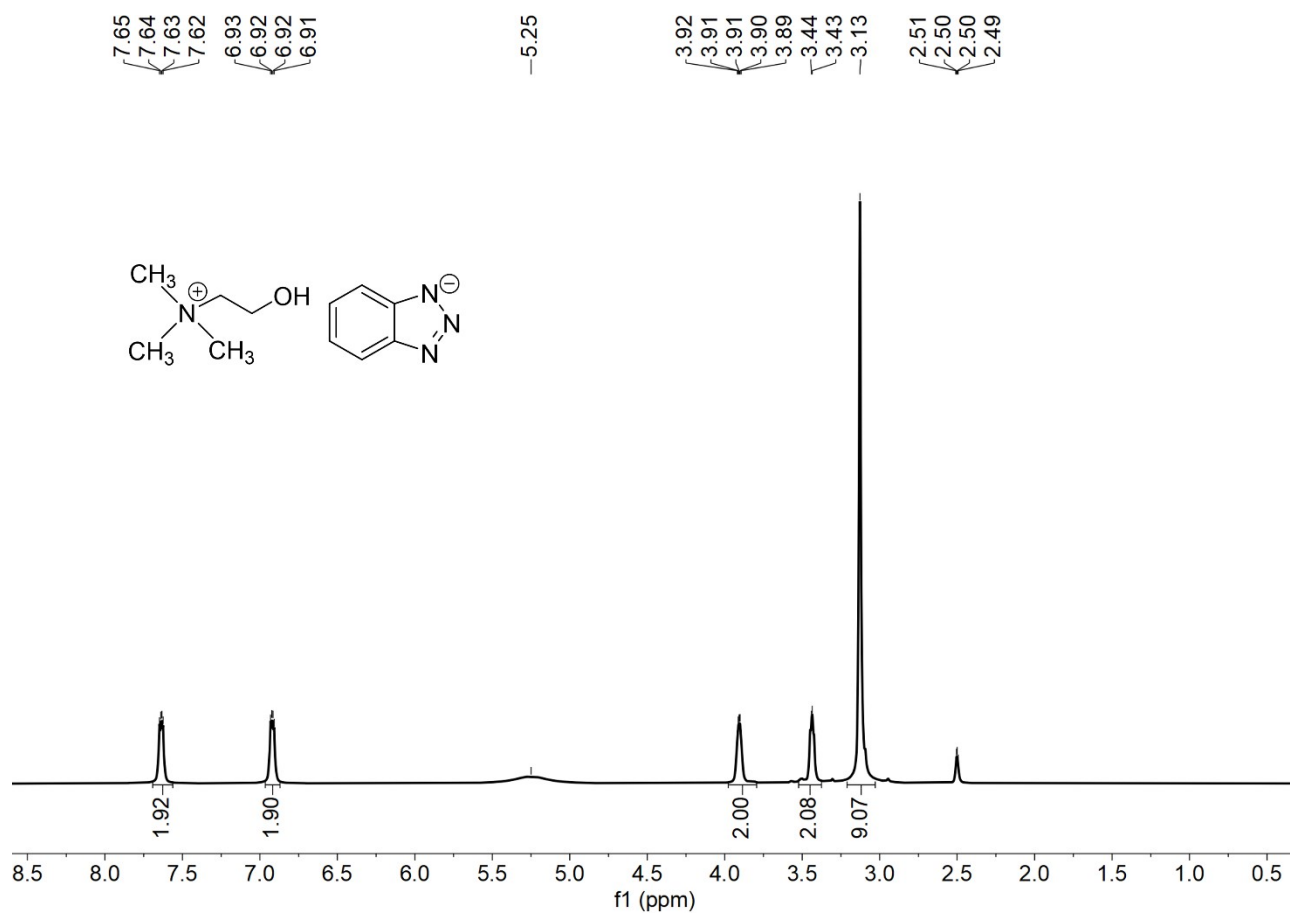

**Figure S4.** <sup>1</sup>H NMR spectra of [Ch][Bentriz]

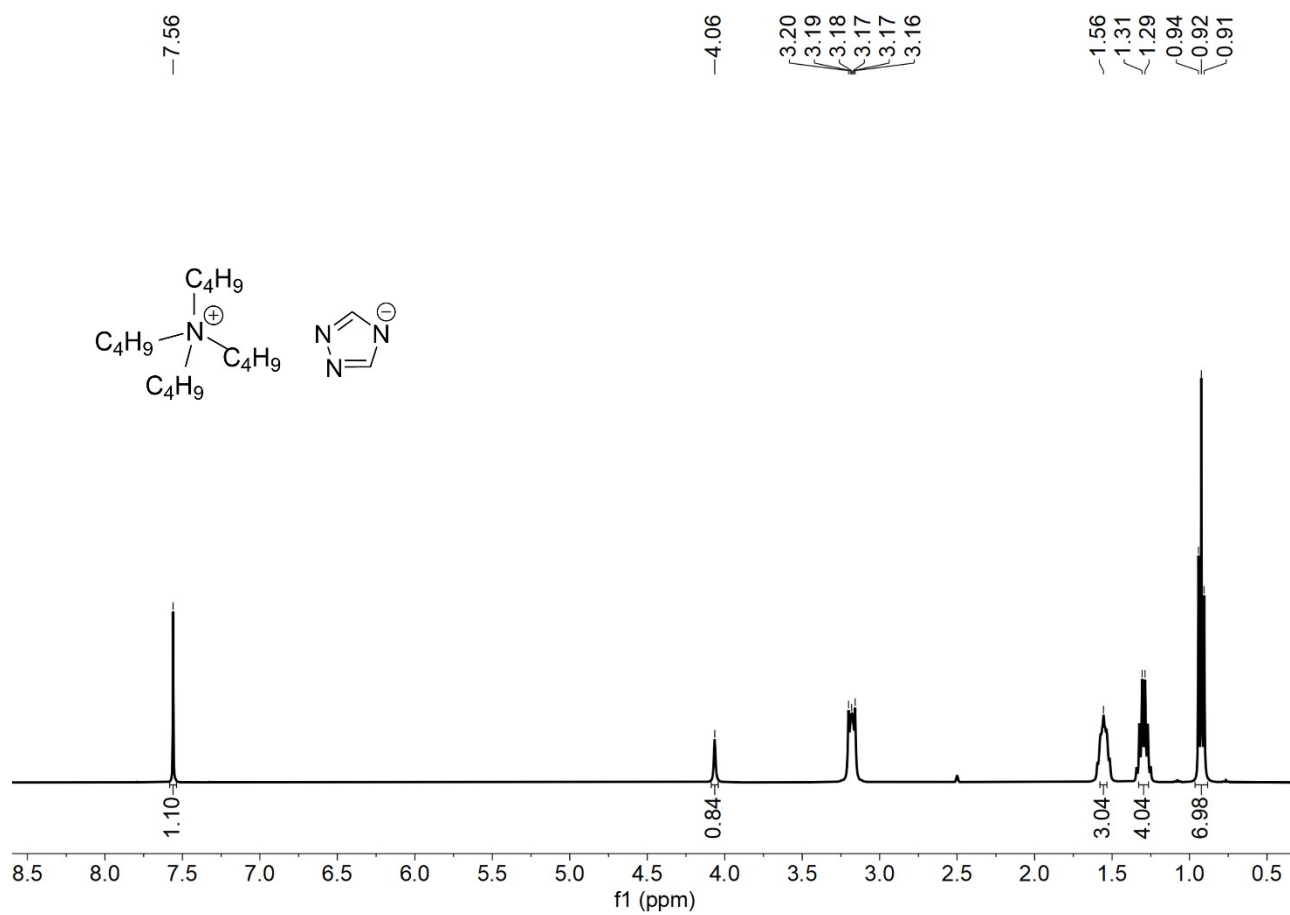

**Figure S5.** <sup>1</sup>H NMR spectra of [N<sub>4444</sub>][Triz]

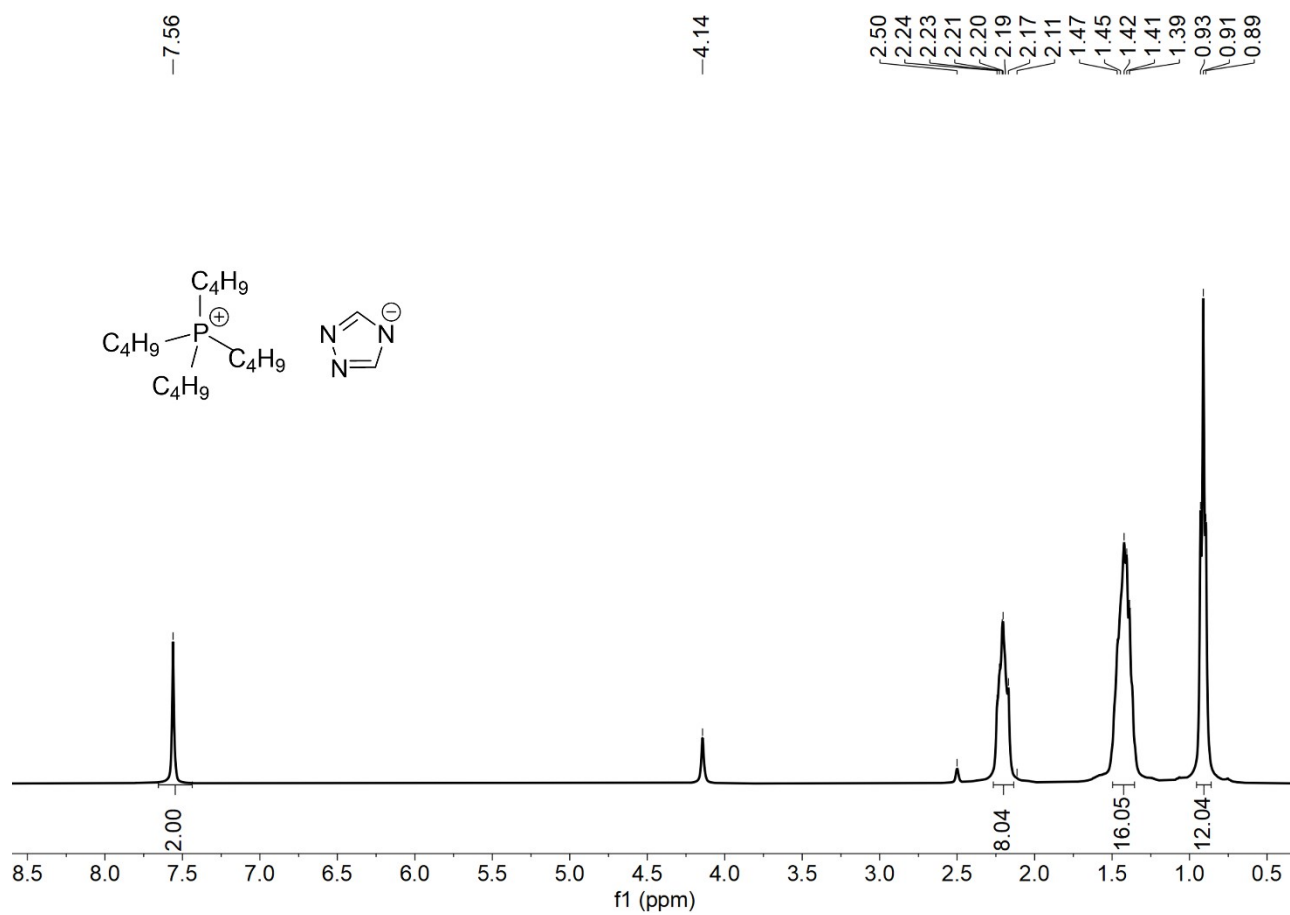

**Figure S6.** <sup>1</sup>H NMR spectra of [P<sub>4444</sub>][Triz]

### 3. <sup>1</sup>H NMR spectra of the products, Figure S7-S11

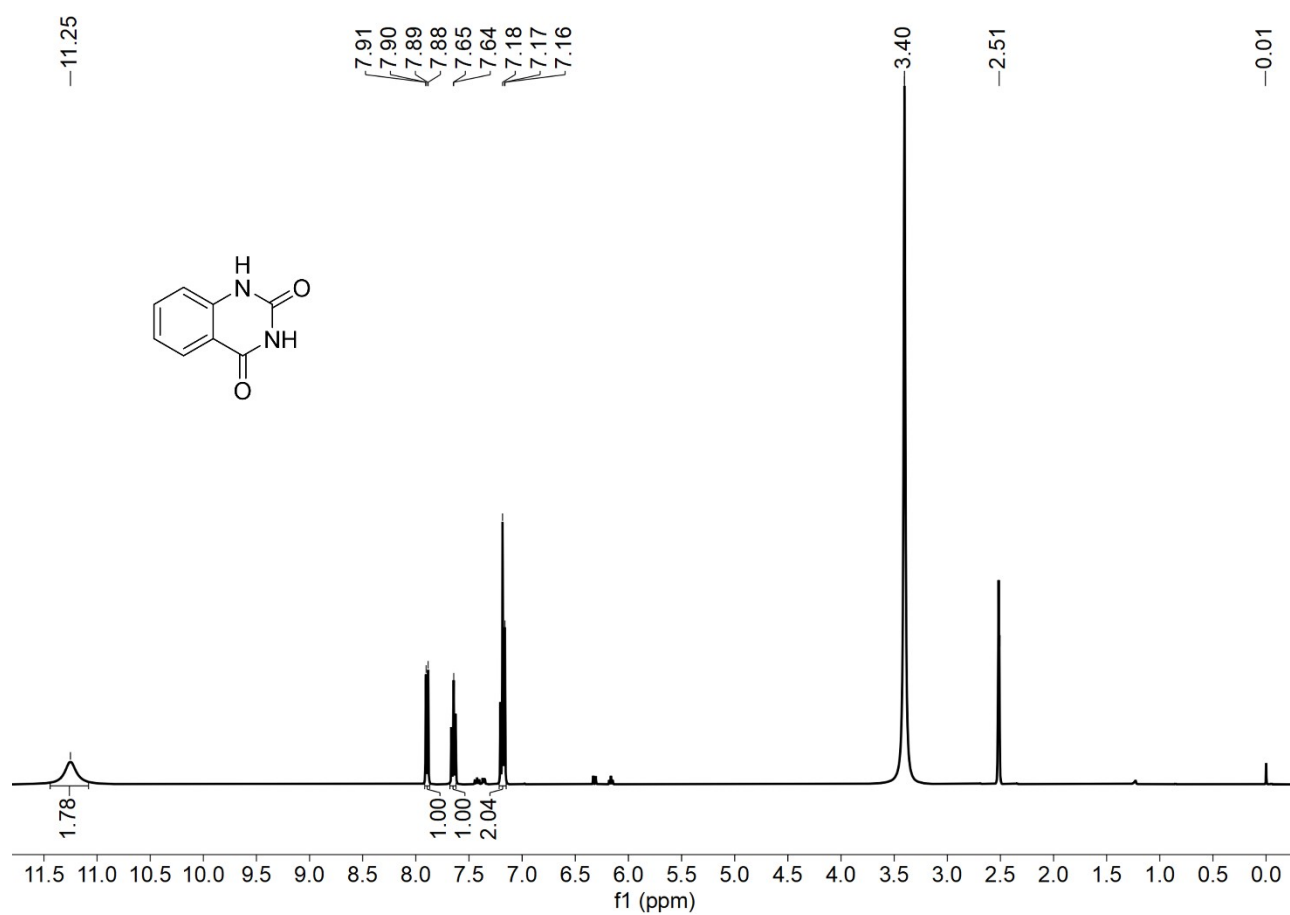

**Figure S7.** <sup>1</sup>H NMR spectra of quinazoline-2,4(1H,3H)-dione



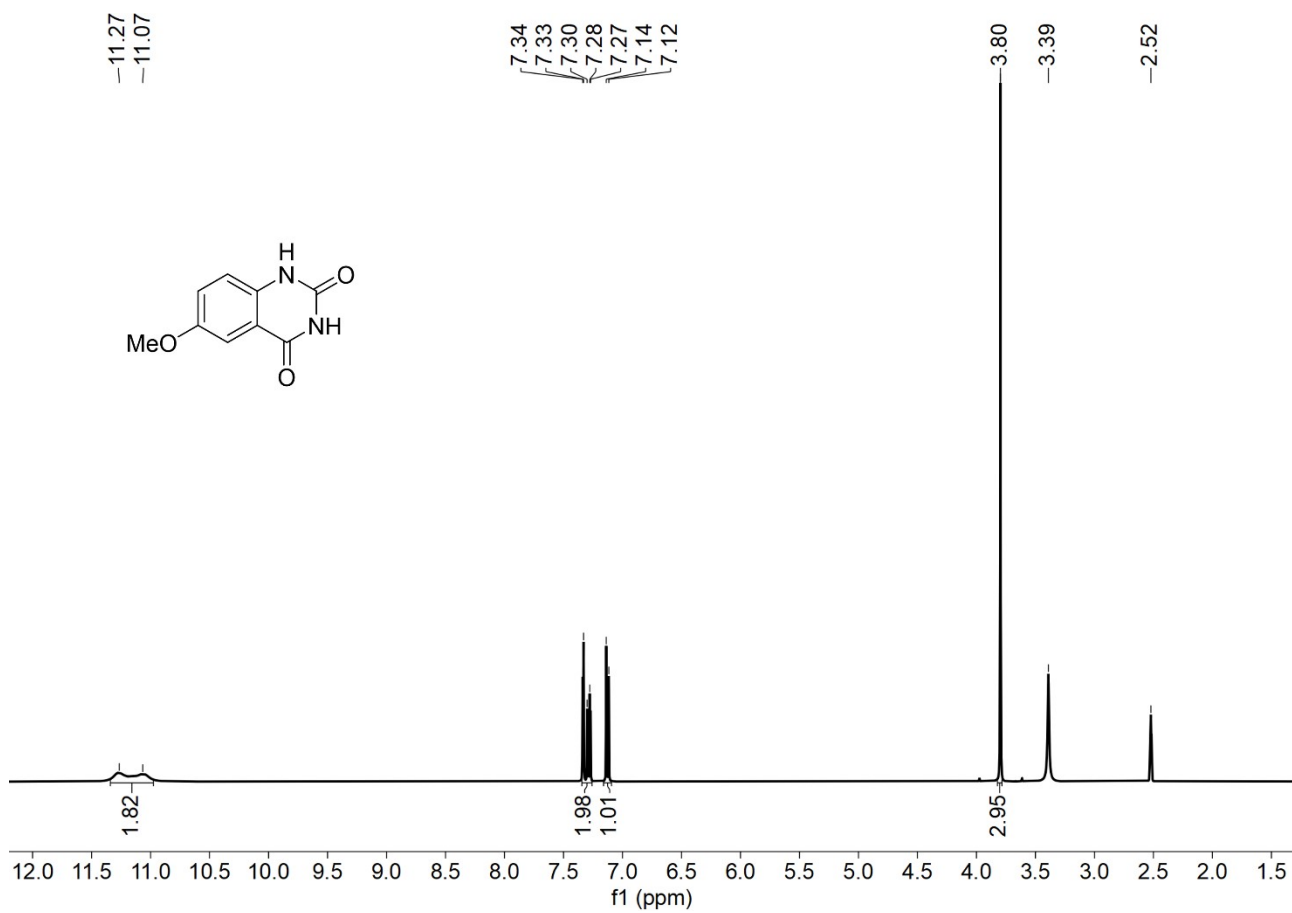

**Figure S8.** <sup>1</sup>H NMR spectra of 7-methoxy-quinazoline-2,4(1H,3H)-dione

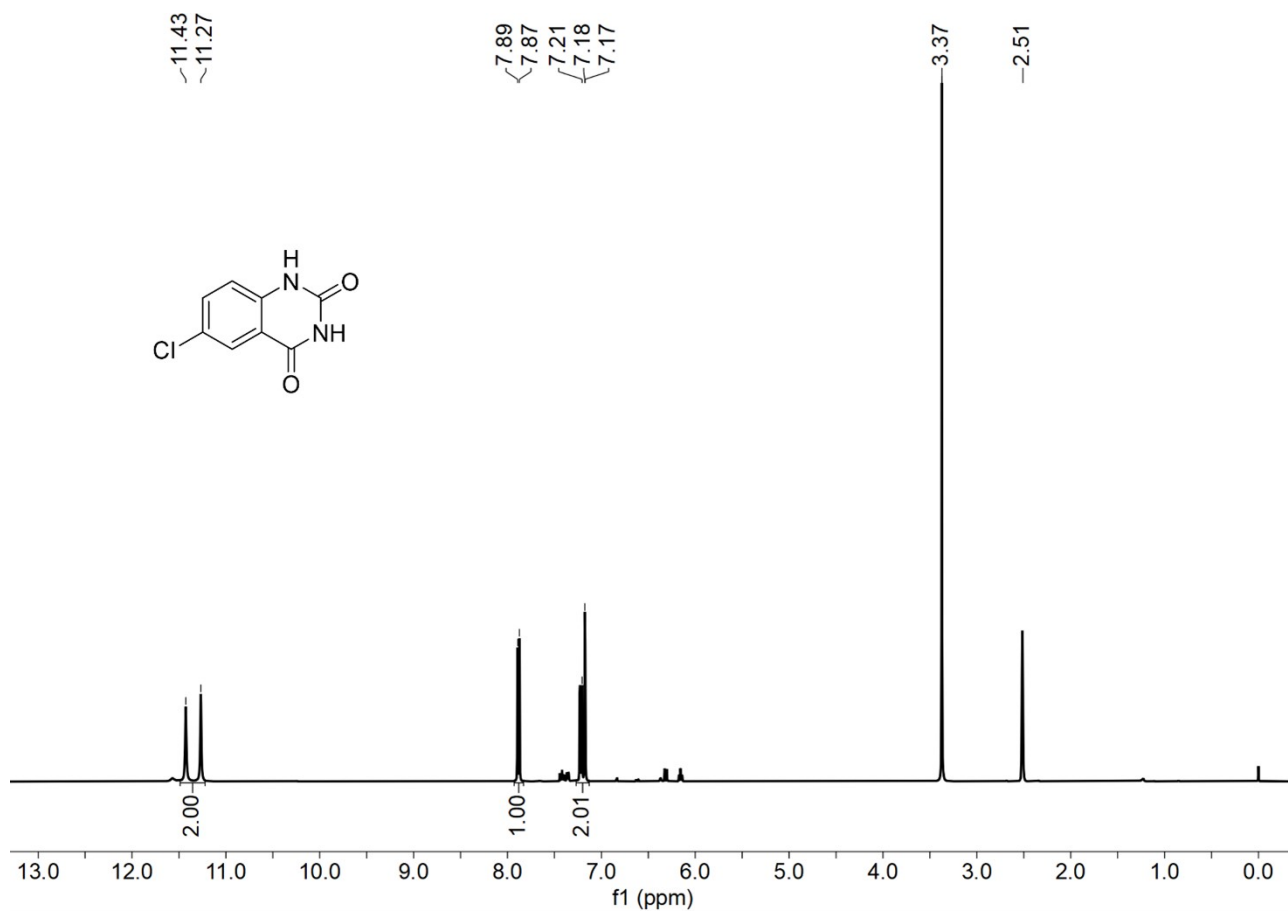

**Figure S9.** <sup>1</sup>H NMR spectra of 7-chlorine-quinazoline-2,4(1H,3H)-dione

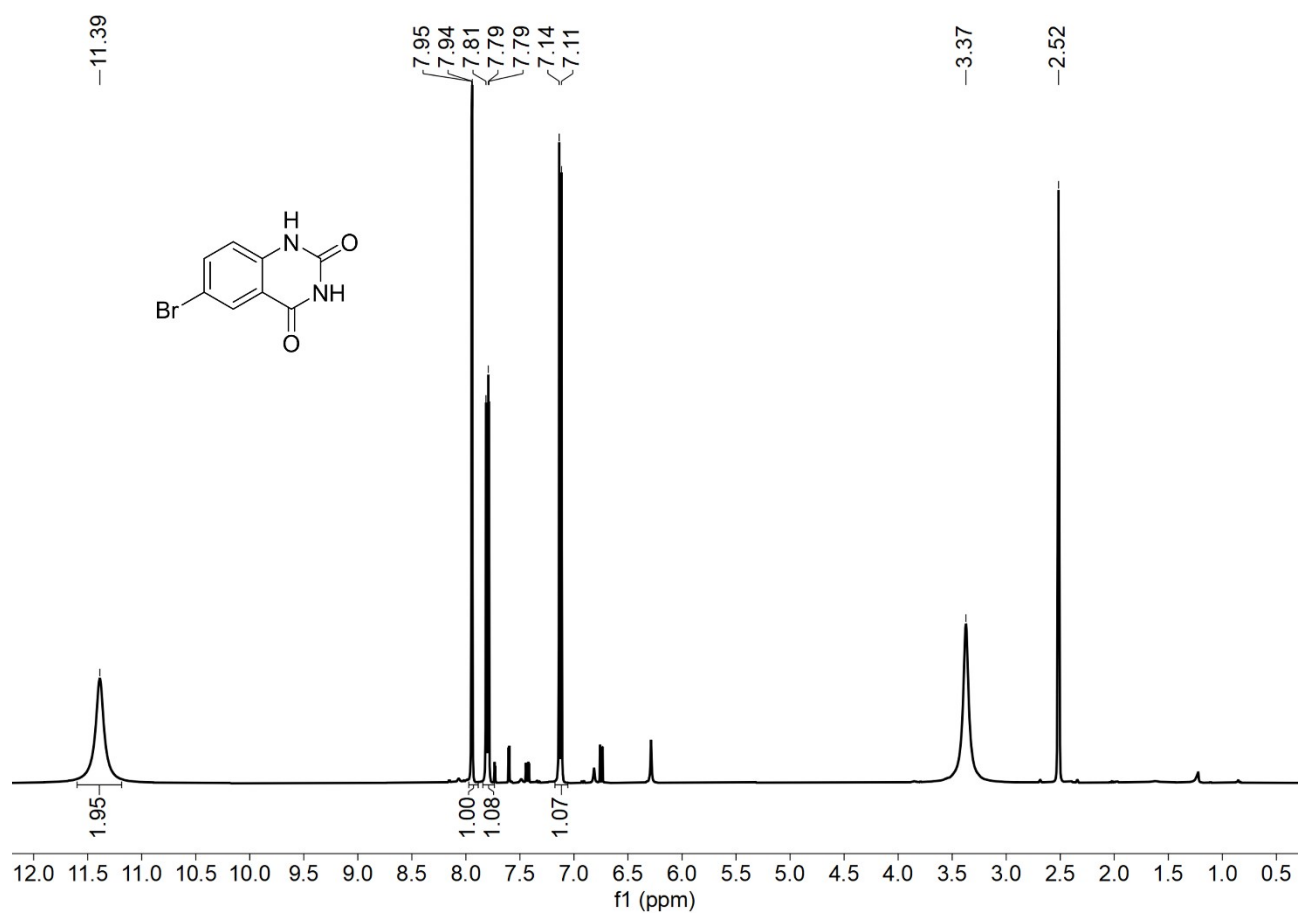

**Figure S10.** <sup>1</sup>H NMR spectra of 7-bromine-quinazoline-2,4(1H,3H)-dione

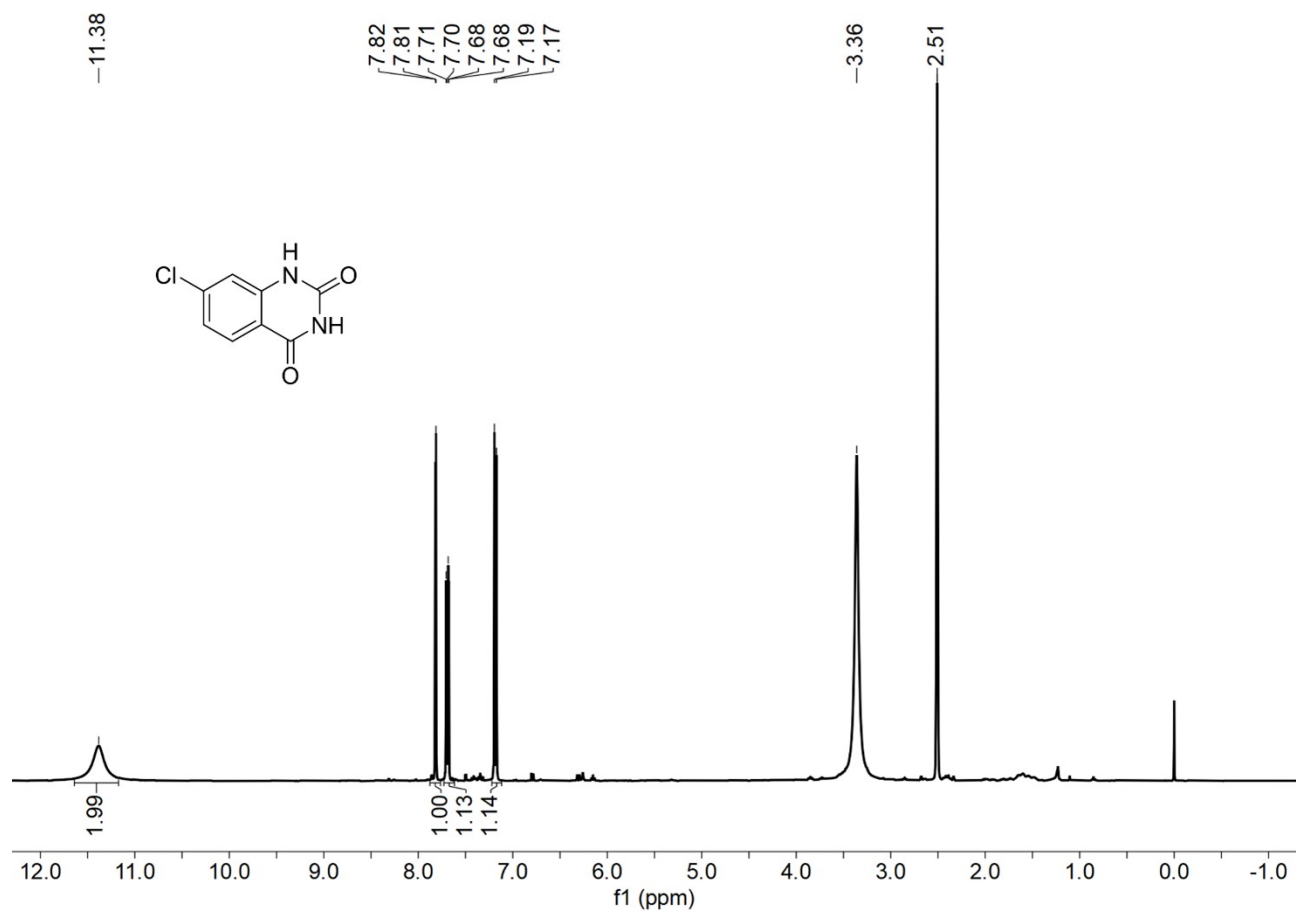

Figure S11. <sup>1</sup>H NMR spectra of 6-chlorine-quinazoline-2,4(1H,3H)-dione
